# Supplementary material for: Enhancing the Spermidine Synthase-Based Polyamine Biosynthetic Pathway to Boost Rapid Growth in Marine Diatom Phaeodactylum tricornutum
Source: MDPI journal article supplement (doi:10.3390/biom14030372), 2024-03-19
Supplement: s1 [file s1]

# Original Images for Blots/Gels

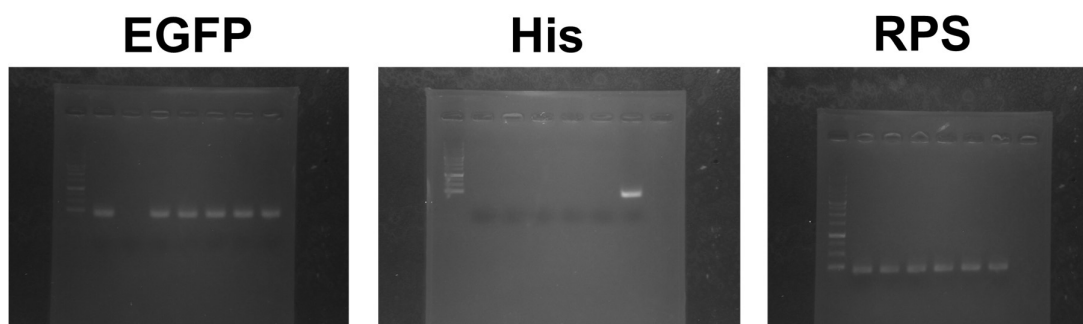

Original agarose gels refer to Figure 5B. In EGFP, lane 2-7 were used for this work.

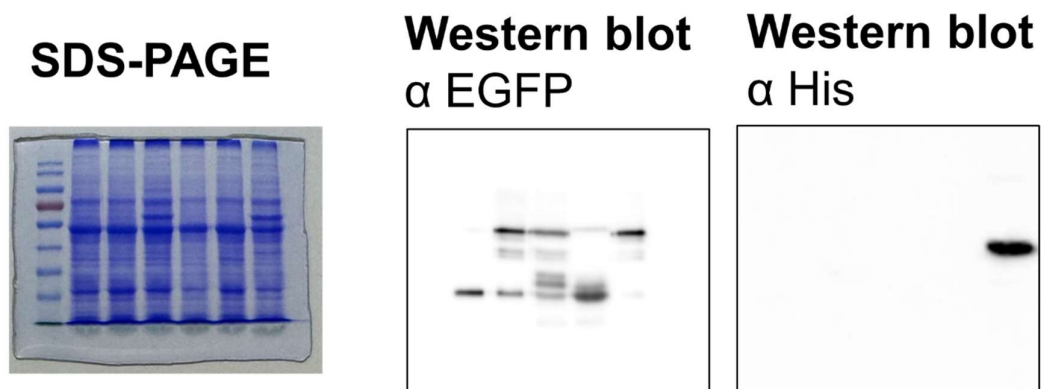

Original western dot photos refer to Figure 5C.

(A)

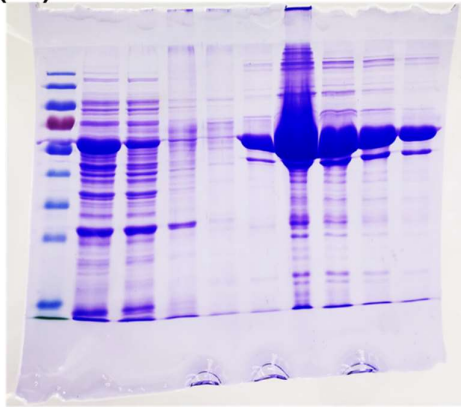

(D)

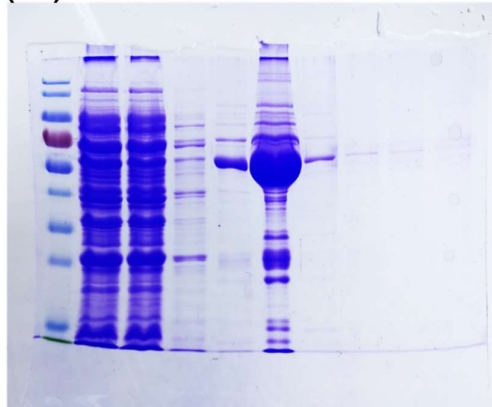

(B)

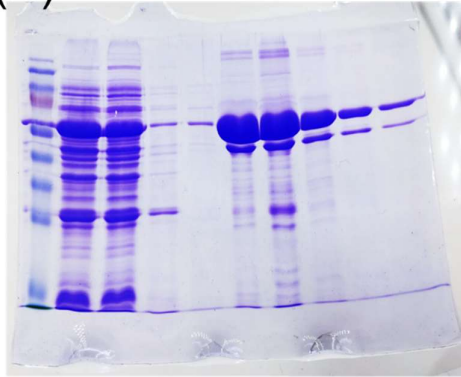

(E)

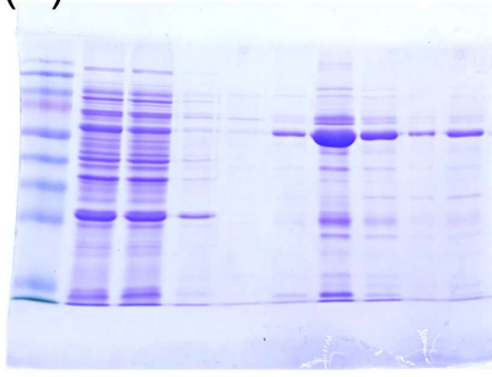

(C)

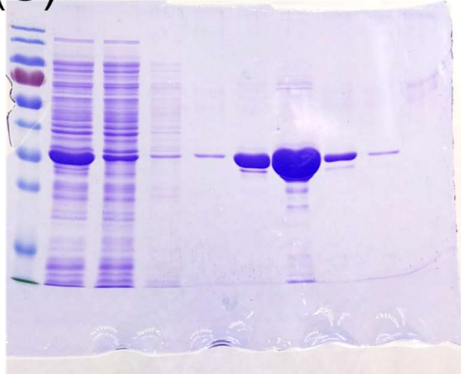

Original SDS-PAGE gels refer to Figure S3 in Supplementary Information.

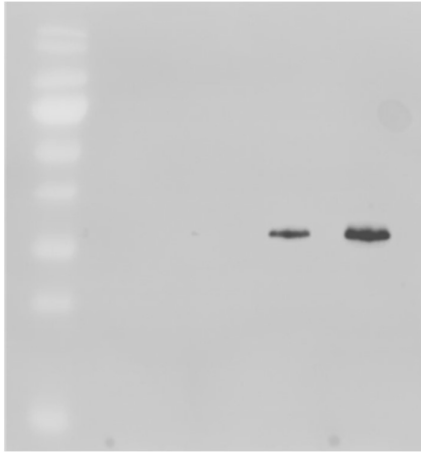

Original western dot photo refers to Figure S4A in Supplementary Information.
