# Supplementary material for: Enhancing the Spermidine Synthase-Based Polyamine Biosynthetic Pathway to Boost Rapid Growth in Marine Diatom Phaeodactylum tricornutum
Source: MDPI journal article supplement (doi:10.3390/biom14030372), 2024-03-19
Supplement: s1 [file s1]

## ***Supporting Information***

# **Enhancing the Spermidine Synthase-Based Polyamine Biosynthesis Pathway to Boost Rapid Growth of Marine Diatoms *Phaeodactylum tricornutum***

Hung-Yun Lin <sup>1</sup>, Chung-Hsiao Liu <sup>2</sup>, Yong-Ting Kang <sup>2</sup>, Sin-Wei Lin <sup>2</sup>, Hsin-Yun Liu <sup>2</sup>, Chun-Ting Lee <sup>2</sup>, Yu-Chen Liu <sup>2</sup>, Man-Chun Hsu <sup>2</sup>, Ya-Yun Chien <sup>2</sup>, Shao-Ming Hong <sup>2</sup>, Yun-Hsuan Cheng <sup>2</sup>, Bing-You Hsieh <sup>2</sup>, Han-Jia Lin <sup>1,2\*</sup>

<sup>1</sup> Center of Excellence for the Oceans, National Taiwan Ocean University, Keelung 202301, Taiwan

<sup>2</sup> Department of Bioscience and Biotechnology, National Taiwan Ocean University, Keelung 202301, Taiwan

\* Correspondence: hanjia@ntou.edu.tw

### **Table of Contents:**

**Table S1.** HPLC gradient conditions for PA analysis

**Table S2.** Information on the specific primers required for clone

**Table S3.** Specific primers required to verify gene expression in this work

**Table S4.** The pulse regime of multi-pulse electroporation

**Table S5.** Amino acid sequence similarity analysis of PtSDS1 and PtSDS2

**Table S6.** 3D structure similarity analysis of the AlphaFold predicted models of PtSDS1 and PtSDS2 against PDB25 database using DALI server.

### **List of Figures:**

**Figure S1.** The standard curves for each PA employed in this work

**Figure S2.** Quantitative PCR standard curves of *RPS*, *PtSDS1*, *PtSDS2*, and *PtCycB1*

**Figure S3.** SDS-PAGE analysis of purified recombinant proteins

**Figure S4.** Protein-protein interactions analysis between PtSDS1 and PtSDS2

**Table S1.** HPLC gradient conditions for PA analysis

| <b>ACN</b> | <b>65%</b> | <b>75%</b> | <b>75%</b> | <b>85%</b> | <b>85%</b> | <b>100%</b> | <b>100%</b> | <b>65%</b> | <b>65%</b> |
|------------|------------|------------|------------|------------|------------|-------------|-------------|------------|------------|
| <b>min</b> | 2.5        | 3          | 15         | 16         | 22         | 37          | 47          | 47.1       | 50         |

**Table S2.** Information on the specific primers required for clone

| Plasmid                | Vector   | Insert  | Sequence (5' to 3")                                    | Mer (bp) | T <sub>m</sub> (°C) | Amplicon size (bp) |
|------------------------|----------|---------|--------------------------------------------------------|----------|---------------------|--------------------|
| pGEX-PtSDS1-His        | pGEX-2T  | PtSDS1  | gtggatccccgggaattcATGAGCGCTGACGAAGATTCCTC <sup>a</sup> | 41       | 61                  | 897                |
|                        |          |         | gtgggtgctcgagcggaaagatggcacGCTGC                       | 31       | 61                  |                    |
|                        |          | His tag | gtgccatctttccgctcgagcaccacCACCACCACCAC                 | 38       | 74                  | 18                 |
|                        |          |         | cagatcgtcagtcagtcacgatGTGGTGGTGGTGGTGGTG               | 40       | 72                  |                    |
| pGEX-PtSDS2-His        | pGEX-2T  | PtSDS2  | ggatccccgggaattcATGTGGCCGGGTCAAAAATTTTCG               | 40       | 61                  | 825                |
|                        |          |         | gtgctcgagctctaattctgcGGTGACGAAGGGAG                    | 35       | 62                  |                    |
|                        |          | His tag | gcaagattagagctcgagcacCACCACCACCACCAC                   | 36       | 71                  | 18                 |
|                        |          |         | gatcgtcagtcagtcacgatGTGGTGGTGGTGGTGGTG                 | 38       | 71                  |                    |
| pGEX-PtSDS1 (Y79F)-His | pGEX-2T  | PtSDS1  | gtggatccccgggaattcATGAGCGCTGACGAAGATTCCTC              | 41       | 61                  | 249                |
|                        |          |         | ctcttgaaacgcaaattcgtcacG                               | 24       | 60                  |                    |
|                        |          |         | gtgacgaatttgcttcaagagATGATT                            | 29       | 60                  | 671                |
|                        |          |         | ggtggtggtggtgctcgagCGGAAAGATGGCACGCTGC                 | 38       | 61                  |                    |
| pGEX-PtSDS2 (F79Y)-His | pGEX-2T  | PtSDS2  | ggatccccgggaattcATGTGGCCGGGTCAAAAATTTTCG               | 40       | 61                  | 178                |
|                        |          |         | catgatatgcaaattcATCACGTTCCG                            | 27       | 60                  |                    |
|                        |          |         | gaattgcatatcatgAAATGATGGTTCA                           | 29       | 58                  | 663                |
|                        |          |         | gtggtggtggtgctcgagCTCTAATCTTGCGGTGACGAAGG              | 41       | 59                  |                    |
| pET-Myc-PtSDS1-His     | pET-21a  | Myc tag | ggtcgcggaatccgaattcGAACAAAACTCATCTCAGAAGAGGATCTG       | 48       | 70                  | 30                 |
|                        |          |         | cagcgctcatcatatgcagATCCTCTTCTGAGATGAGTTTTTGTTC         | 46       | 68                  |                    |
|                        |          | PtSDS1  | ctgcatatgatgagcgctgACGAAGATTCCTC                       | 32       | 61                  | 897                |
|                        |          |         | gtggtggtggtgctcgagCGGAAAGATGGCACGCTGC                  | 37       | 61                  |                    |
| pNR-PtSDS1-EGFP        | pNR-EGFP | PtSDS1  | cttgtgcgaacggaattcATGAGCGCTGACGAAGATTCCT               | 40       | 61                  | 897                |
|                        |          |         | ccttgctcaccataccggtCGGAAAGATGGCACGCTGC                 | 38       | 61                  |                    |
| pNR-PtSDS2-EGFP        | pNR-EGFP | PtSDS2  | cttgtgcgaacggaattcATGTGGCCGGGTCAAAAATTTTCG             | 42       | 61                  | 825                |
|                        |          |         | cttgctcaccataccggtCTCTAATCTTGCGGTGACGAAGG              | 41       | 60                  |                    |
| pNR-PtSAMDC-EGFP       | pNR-EGFP | PtSAMDC | cacttgtgcgaacggaattcATGTCTCCGCTGCCACCGGATTG            | 43       | 66                  | 1458               |
|                        |          |         | ctcgcccttgctcaccataccggtCGAAACCGACATGCCCCGCAAC         | 46       | 66                  |                    |
| pNR-PtSAMDC-His        | pNR-EGFP | PtSDS1  | cttgtgcgaacggaattcATGTCTCCGCTGCCACCGGA                 | 38       | 65                  | 1458               |
|                        |          |         | gtgactagtcgaaaccgacATGCCCCGCAA                         | 30       | 65                  |                    |
|                        |          | His tag | gtcggtttcgactagtcacCACCACCACCACCAC                     | 34       | 70                  | 18                 |
|                        |          |         | gcacgcttctgaagcttGTGGTGGTGGTGGTGGTG                    | 35       | 72                  |                    |

<sup>a</sup> Lowercase denotes the overlapping region necessary for Gibson assembly.

**Table S3.** Specific primers used to verify gene expression in this work

| <b>Amplified gene</b> | <b>Primer sequence</b>        | <b>Mer (bp)</b> | <b>T<sub>m</sub> (°C)</b> | <b>Amplicon size (bp)</b> |
|-----------------------|-------------------------------|-----------------|---------------------------|---------------------------|
| <b>RPS</b>            | 5'-ATAACTGCACCCACTTCCCA-3'    | 20              | 60                        |                           |
|                       | 5'-TGGACCATCTTCACTACGGG-3'    | 20              | 62                        |                           |
| <b>PtCycB1</b>        | 5'-GCATCCACGTGTTGGCTCA-3'     | 19              | 62                        |                           |
|                       | 5'-CTCCAGCCTACTCATTGGGATCA-3' | 23              | 64                        |                           |
| <b>PtSDS1</b>         | 5'-TAACCTGCTCGAAGACAGAC-3'    | 20              | 60                        |                           |
|                       | 5'-AGAGCCATCCGGTGATGTTA-3'    | 20              | 60                        |                           |
| <b>PtSDS2</b>         | 5'-GCGACTTCAACAGCAACTC-3'     | 19              | 60                        |                           |
|                       | 5'-GGTCCAGGGTTTCTTACTCC-3'    | 20              | 62                        |                           |
| <b>EGFP</b>           | 5'-ATAACTGCACCCACTTCCCA-3'    | 20              | 60                        |                           |
|                       | 5'-TGGACCATCTTCACTACGGG-3'    | 20              | 62                        |                           |
| <b>PtSAMDC-His</b>    | 5'-GCATCCACGTGTTGGCTCA-3'     | 19              | 62                        |                           |
|                       | 5'-CTCCAGCCTACTCATTGGGATCA-3' | 23              | 64                        |                           |

**Table S4.** The pulse regime of multi-pulse electroporation

|                            | <b>Initial voltage</b> | <b>Pulse time</b> | <b>Pulse interval</b> | <b>Voltage decay rate</b> | <b>Number of pulses</b> |
|----------------------------|------------------------|-------------------|-----------------------|---------------------------|-------------------------|
| <b>Poring pulses</b>       | 300 V                  | 50 ms             | 50 ms                 | 10%                       | 8                       |
| <b>Transferring pulses</b> | 8 V                    | 50 ms             | 50 ms                 | 40%                       | 5                       |

**Table S5.** Amino acid sequence similarity analysis of PtSDS1 and PtSDS2.

|               | <b>PtSDS1</b> | <b>PtSDS2</b> | <b>HsSDS</b> | <b>AtSDS</b> | <b>HsSMS</b> | <b>AtSMS</b> |
|---------------|---------------|---------------|--------------|--------------|--------------|--------------|
| <b>PtSDS1</b> | -             | 48%           | 58%          | 50%          | 26%          | 50%          |
| <b>PtSDS2</b> | 48%           | -             | 47%          | 46%          | 31%          | 44%          |

**Table S6.** 3D structure similarity analysis of the AlphaFold predicted models of PtSDS1 and PtSDS2 against PDB25 database using DALI server.

| <b>N-terminal domain of PtSDS1 (residue 14-74)</b>  |                  |                      |                   |                   |                   |                  |                                          |
|-----------------------------------------------------|------------------|----------------------|-------------------|-------------------|-------------------|------------------|------------------------------------------|
| Rank                                                | PDB <sup>1</sup> | Z-score <sup>2</sup> | RMSD <sup>3</sup> | lali <sup>4</sup> | nres <sup>5</sup> | %id <sup>6</sup> | Description                              |
| 1                                                   | 4YUV             | 11.8                 | 1.0 Å             | 61                | 294               | 56               | SPERMIDINE SYNTHASE, PUTATIVE;           |
| 2                                                   | 1UIR             | 7.6                  | 1.2 Å             | 53                | 313               | 36               | POLYAMINE AMINOPROPYLTRANSFERASE;        |
| 3                                                   | 2CMG             | 7.3                  | 1.7 Å             | 52                | 262               | 17               | SPERMIDINE SYNTHASE;                     |
| 4                                                   | 3C6K             | 6.5                  | 2.3 Å             | 53                | 348               | 19               | SPERMINE SYNTHASE;                       |
| 5                                                   | 6SJ9             | 3.9                  | 2.6 Å             | 49                | 642               | 8                | PROTEASOME ACCESSORY FACTOR B/C (PAFBC); |
| <b>N-terminal domain of PtSDS2 (residue 21-102)</b> |                  |                      |                   |                   |                   |                  |                                          |
| Rank                                                | PDB              | Z-score              | RMSD              | lali              | nres              | %id              | Description                              |
| 1                                                   | 4YUV             | 7.8                  | 0.7 Å             | 82                | 294               | 49               | SPERMIDINE SYNTHASE, PUTATIVE;           |
| 2                                                   | 1UIR             | 7.0                  | 0.7 Å             | 82                | 313               | 45               | POLYAMINE AMINOPROPYLTRANSFERASE;        |
| 3                                                   | 3C6K             | 5.8                  | 1.7 Å             | 76                | 348               | 36               | SPERMINE SYNTHASE;                       |
| 4                                                   | 2CMG             | 5.6                  | 1.4 Å             | 79                | 262               | 20               | SPERMIDINE SYNTHASE;                     |
| 5                                                   | 7UJ5             | 4.8                  | 2.8 Å             | 57                | 257               | 9                | GLUTAMATE RACEMASE;                      |

<sup>1</sup>Resource database: Dail-PDB25 subset Protein Data Bank.

<sup>2</sup>Z-score: How likely you are to find this hit; Z-score less than 4 is usually meaningless.

<sup>3</sup>RMSD: The root-mean-square deviation of atomic positions of Cα between two protein models; RMSD less than 4 Å is usually meaningless.

<sup>4</sup>lali: Length of alignment.

<sup>5</sup>nres: Residues of whole protein.

<sup>6</sup>%id: Protein identity

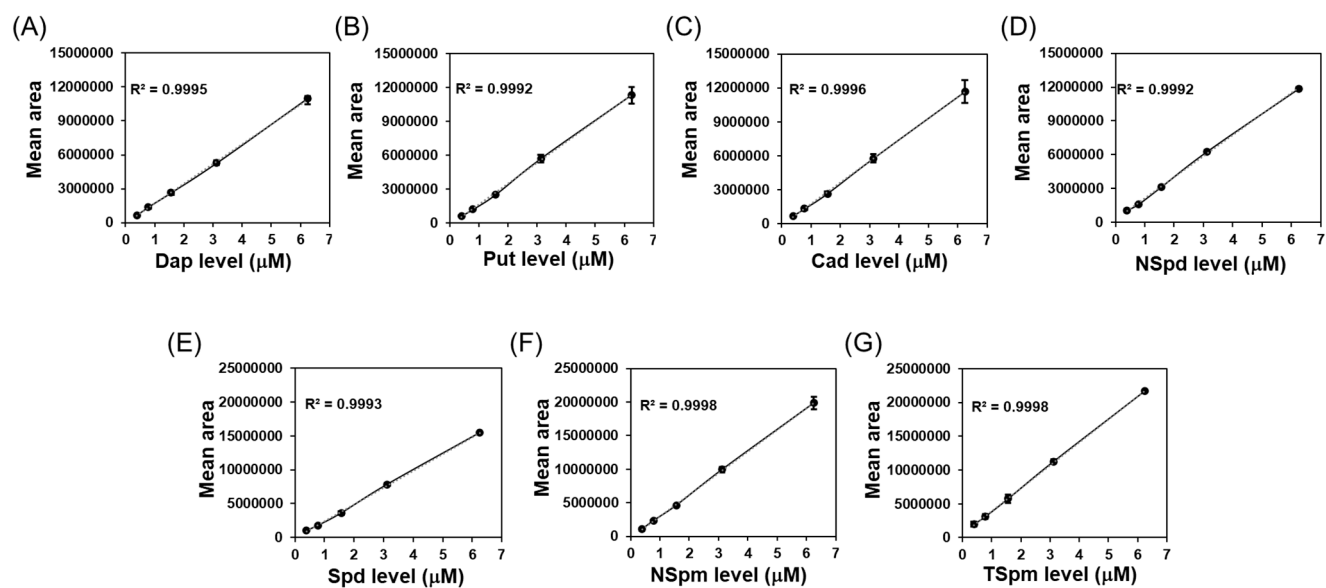

**Figure S1.** The standard curves for each PA employed in this work. Error bars depicted the standard deviation from the mean of 3 independent experiments.



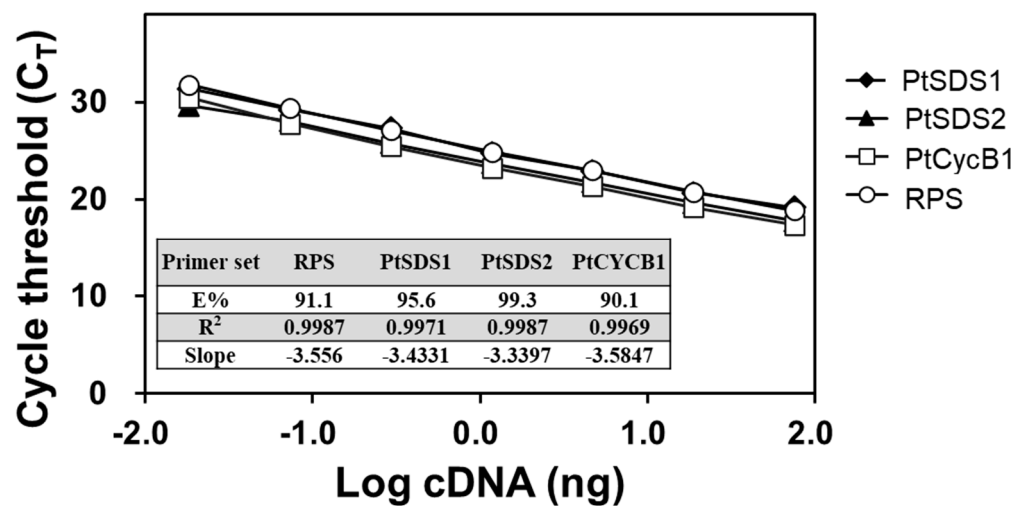

**Figure S2.** Quantitative PCR standard curves of RPS, PtSDS1, PtSDS2, and PtCycB1. The standard curves were constructed by plotting cycle threshold values against the logarithm of serially diluted cDNA. The inset table displays the amplification efficiency (E%), R-squared value (R<sup>2</sup>), and slope for each gene.

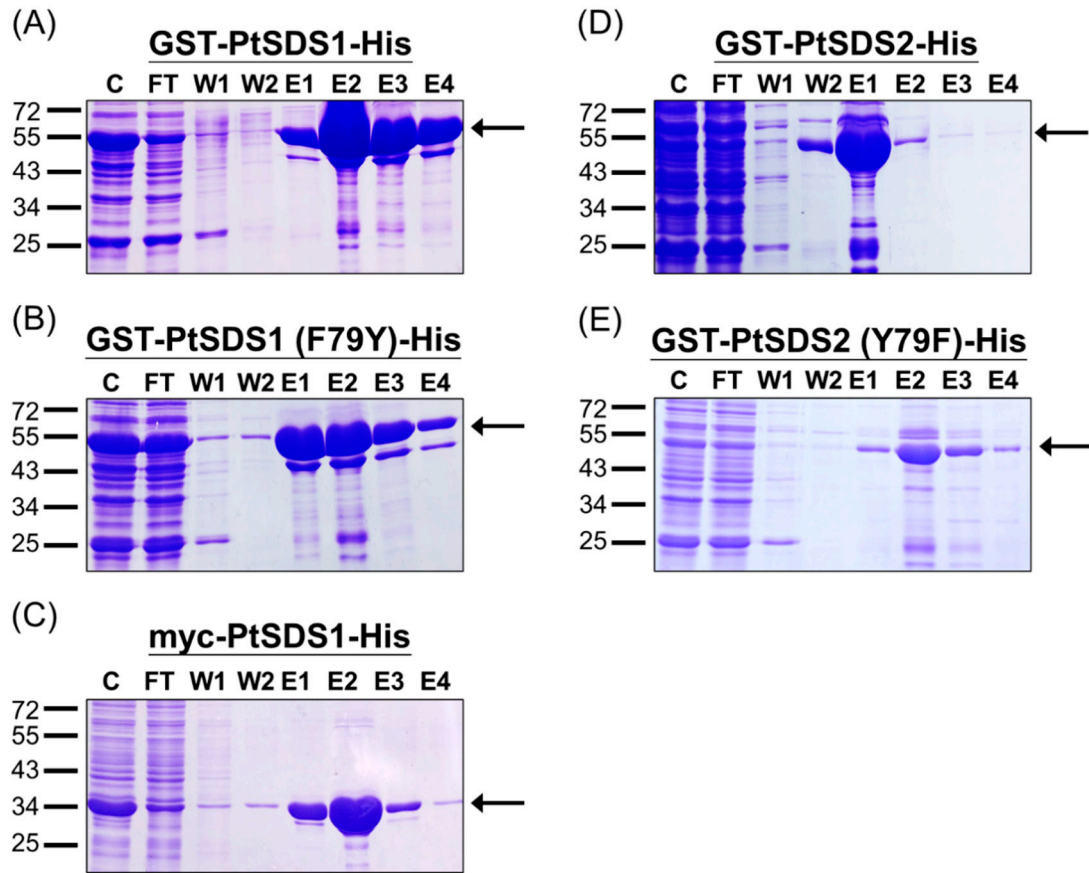

**Figure S3.** SDS-PAGE analysis of purified recombinant proteins. Recombinant proteins (A) GST-PtSDS1-His, (B) PtSDS1(Y79F), (C) myc-PtSDS1-His, (D) GST-PtSDS2-His, and (E) GST-PtSDS2(F79Y)-His were expressed in *Escherichia coli*, and the target proteins were subsequently purified using Nicke resin. Finally separating recombinant protein through 12% SDS-PAGE, followed by coomassie brilliant blue staining for whole protein visualization. (Meaning of figure's abbr. : Crude protein, C; Flow through, FT; W1/W2, Wash protein 1/2; Elution protein 1-4, E1-E4)

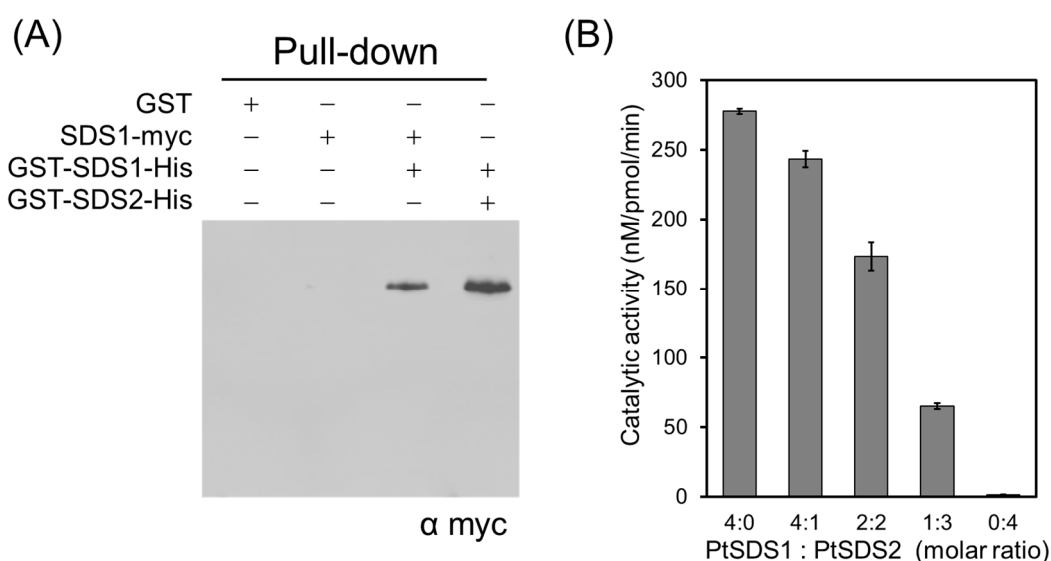

**Figure S4.** Protein-protein interactions analysis between PtSDS1 and PtSDS2. (A) Analyzing the biochemical properties of recombinant proteins through pull-down assay. Recombinant proteins myc-PtSDS1-His, GST-PtSDS2-His, and GST-PtSDS1-His, each at equimolar concentrations, were mixed and incubated. The resulting protein complexes were then bound to glutathione-Sepharose 4B beads. Following elution with Laemmli sample buffer, the samples were subjected to western blotting analysis. (B) Catalytic activity analysis of the myc-PtSDS1-His and GST-PtSDS2-His recombinant proteins upon mixture. Myc-PtSDS1-His recombinant protein was mixed with GST-PtSDS2-His recombinant protein at various molar ratios (4:0, 3:1, 2:2, 1:3, 0:4), followed by in vitro activity assays in test tubes. Subsequently, the polyamine products were analysed using High-Performance Liquid Chromatography (HPLC).
