# Supplementary material for: Enhancing the Spermidine Synthase-Based Polyamine Biosynthetic Pathway to Boost Rapid Growth in Marine Diatom Phaeodactylum tricornutum
Source: Biomolecules. 2024 Mar 19;14(3):372. doi: 10.3390/biom14030372 (PMC10968388; doi:10.3390/biom14030372)
Supplement: Supplementary file 1 [file biomolecules-14-00372-s001.zip]

Archive with 6 entries (6 files):
- 240321_Diatom_SDS_Supplementary_Information.pdf
- Additional file S1_AlphaFold prediction for PtSDS1.zip
- Additional file S2_AlphaFold prediction for PtSDS2.zip
- Additional file S3_N-terminal domain of PtSDS1 (residue 14-74).zip
- Additional file S4_N-terminal domain of PtSDS2 (residue 21-102).zip
- Additional file S5_Original Images for Blots and Gels.pdf
